# Supplementary material for: A nucleostemin-like GTPase required for normal apical and floral meristem development in Arabidopsis
Source: PubMed Central journal article supplement — Mol Biol Cell. 2012 Apr 15;23(8):1446–56. doi: 10.1091/mbc.E11-09-0797 (PMC3327326; doi:10.1091/mbc.e11-09-0797), 2012-04-15
Supplement: supp_E11-09-0797_CombinedSupMats.pdf [file supp_E11-09-0797_CombinedSupMats.pdf]

**Supplements to:**

**A Nucleostemin-like GTPase Required for Apical and Floral Meristem Development in Arabidopsis**

X. Wang, D. K. Gingrich, Y. Deng and Z. Hong

**Table S1.** Reduced floral organ numbers in *nsn1 ap2* double mutants

| Genotype          | No. of flowers analyzed | No. of organ in whorl 1 | No. of organ in whorl 2 | No. of organ in whorl 3 | No. of organ in whorl 4 |
|-------------------|-------------------------|-------------------------|-------------------------|-------------------------|-------------------------|
| WT                | 42                      | 4 ± 0                   | 4 ± 0                   | 6 ± 0                   | 2 ± 0                   |
| <i>nsn1</i>       | 42                      | 2.2 ± 0.9               | 0.7 ± 1.2               | 2.4 ± 1.9               | 1.6 ± 0.7               |
| <i>ap2-1</i>      | 42                      | 4 ± 0                   | 4 ± 0                   | 5.9 ± 0                 | 2 ± 0                   |
| <i>nsn1 ap2-1</i> | 42                      | 3.4 ± 0.9               | 1.6 ± 1.2               | 4.4 ± 1.7               | 2.0 ± 1.0               |
| <i>ap2-2</i>      | 42                      | 2.3 ± 0.7               | 0 ± 0                   | 1.7 ± 1.2               | 1.9 ± 0.4               |
| <i>nsn1 ap2-2</i> | 42                      | 1.5 ± 0.9               | 0 ± 0                   | 0.1 ± 0.3               | 1.4 ± 0.8               |





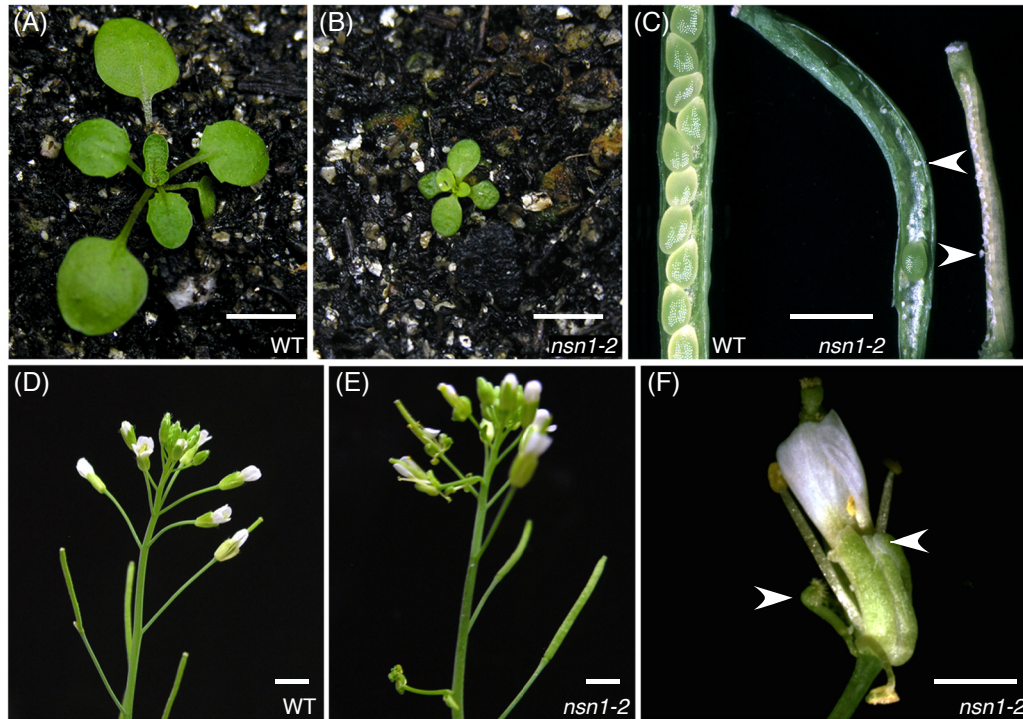

**Suppl. Figure S2.** Growth and reproduction phenotypes of *nsn1-2* mutant plants. (A-B) 20-day-old plants of the WT control (A) and *nsn1-2* (B). (C) Siliques of *nsn1-2* contained aborted ovaries and produced few seeds, as compared to the wild type (WT). Arrowheads indicate the aborted ovaries in *nsn1-2* homozygote siliques. (D) Indeterminate inflorescence of a 35-day-old wild type plant. (E) Terminating inflorescence with carpelloid flowers of a 45-day-old *nsn1-2* mutant plant. (F) An enlarged defective flower from (E). Scale bars, 5 mm in (A-B), 2 mm in (C-F).

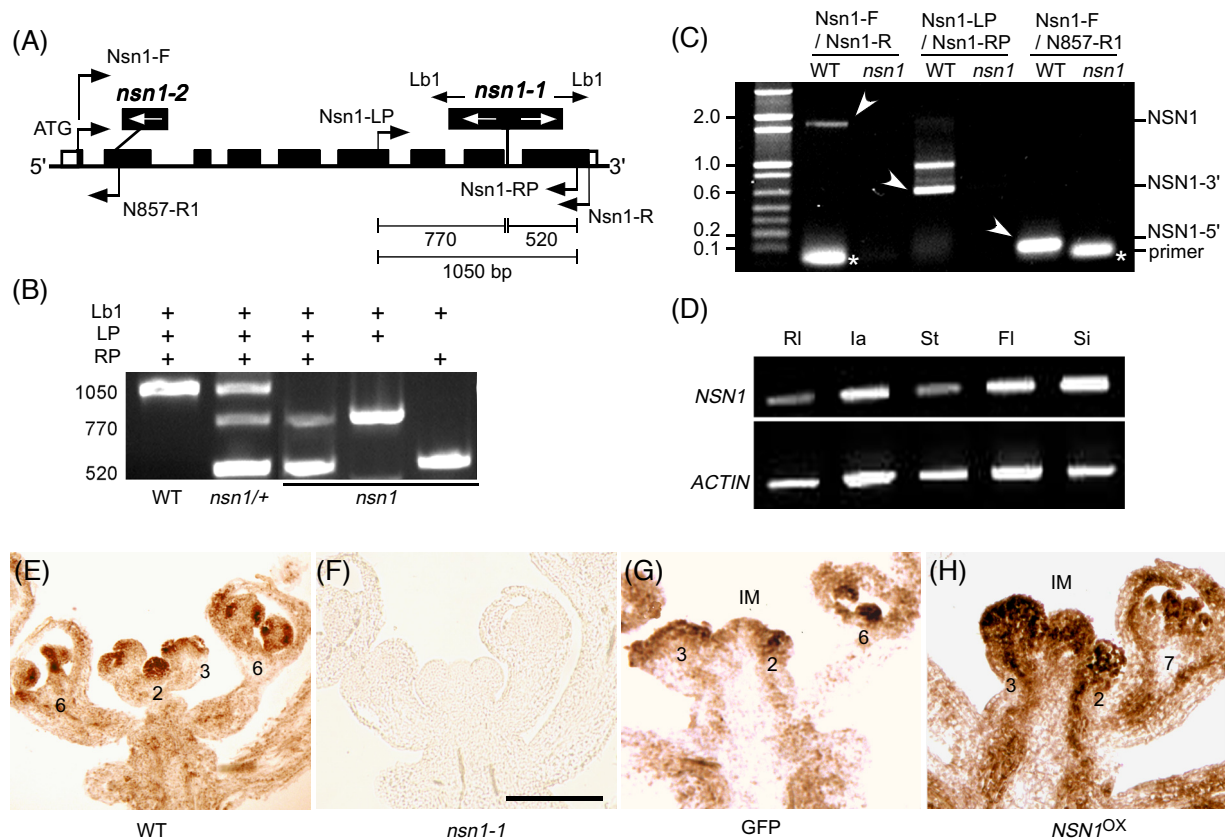

**Suppl. Figure S3.** Expression of *NSN1* mRNA in wild type *Arabidopsis*, *nsn1-1* mutant and *NSN1<sup>OX</sup>* plants. (A) Positions of three pairs of primers used to detect *NSN1* mRNA transcript in *nsn1-1* mutant plants. Primers Nsn1-F and Nsn1-R correspond to the cDNA sequences in the start codon and stop codon regions, and produce a PCR product of 1,750 bp using genomic DNA of WT plants. Primers Nsn1-LP and Nsn1-RP flank the T-DNA insertion site and produced a 1050-bp PCR product in WT. Nsn1-F and N857-R1 amplify a 256-bp genomic DNA product or a 133-bp cDNA band in WT plants. Filled boxes are coding exons of *NSN1* gene and open boxes are non-coding exons. Lines represent introns of *NSN1*. (B) Genomic DNA isolated from individual plants was used for PCR amplification using primers as indicated in (A). (C) RT-PCR results using three pairs of primers. Note that the 5'-mRNA coding sequence, the mRNA region flanking the T-DNA insertion site, and the full-length *NSN1* mRNA were undetectable in *nsn1-1* mutant, suggesting that it is a null-mutation. Primer dimers are indicated by asterisks. (D) Tissue-specific expression of *NSN1* using RT-PCR. RT-PCR was done using total RNAs from different tissues, including rosette leaf (RI), inflorescence apex (Ia), stem (St), flower (Fl), and silique (Si). The expression of *Actin* gene served as an internal template control. (E-H) Expression levels of *NSN1* mRNA in the inflorescence meristem of wildtype (E), *nsn1-1* (F), and transgenic plants expressing *35S<sub>pro</sub>:GFP* (a control, G) and *35S<sub>pro</sub>:NSN1-GFP* (*NSN1<sup>OX</sup>*, H). In the controls of wild type and GFP-expressing plants, the *NSN1* mRNA signals could be detected in the IM and floral primordia at stages 2-6. In *NSN1<sup>OX</sup>* transgenic plants, the *NSN1* mRNA signal was enhanced, and could be detected in the IM and floral primordia of various stages. The *NSN1* mRNA could also be detected in the pedicles of developing flowers. Scale bars, 100  $\mu$ m in (E-H).

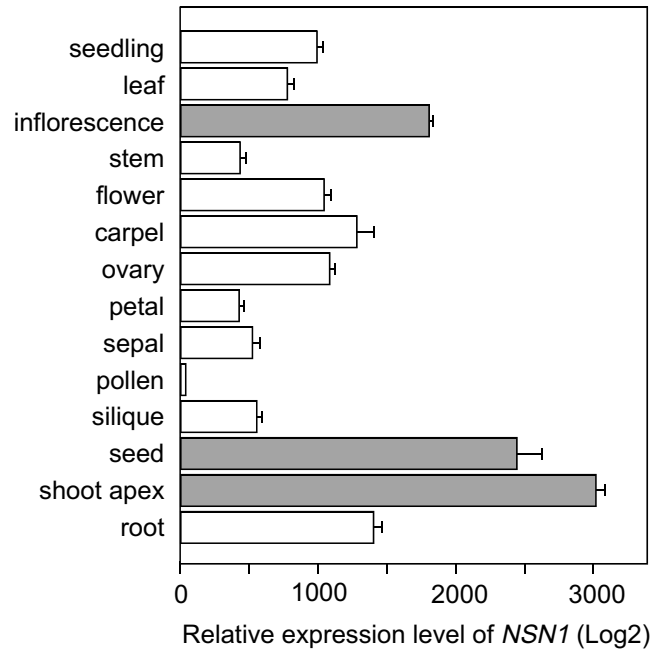

**Suppl. Figure S4.** Expression profile of *NSN1* mRNA in different tissues of wild type *Arabidopsis* plants. The expression level of At3g07050 (*NSN1*) is presented in relative values in log<sub>2</sub>. Data were retrieved from the public microarray data set (<https://www.genevestigator.ethz.ch>).

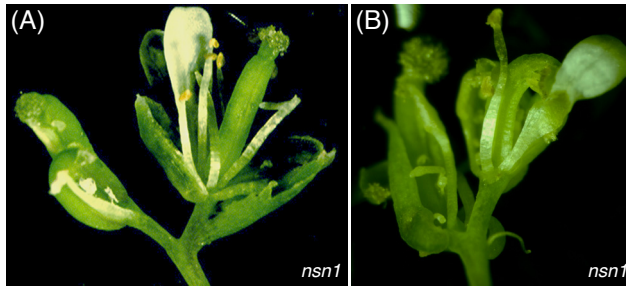

**Suppl. Figure S5.** Non-terminal carpelloid flowers of *nsn1-1*. Carpelloid flowers were produced at non-terminal positions of inflorescences of *nsn1-1* plants. Shown were a carpelloid flower at position 38 (A) and position 35 (B) of a 40 day-old *nsn1-1* plant, which developed a terminal carpelloid flower at the position of flower number 41.

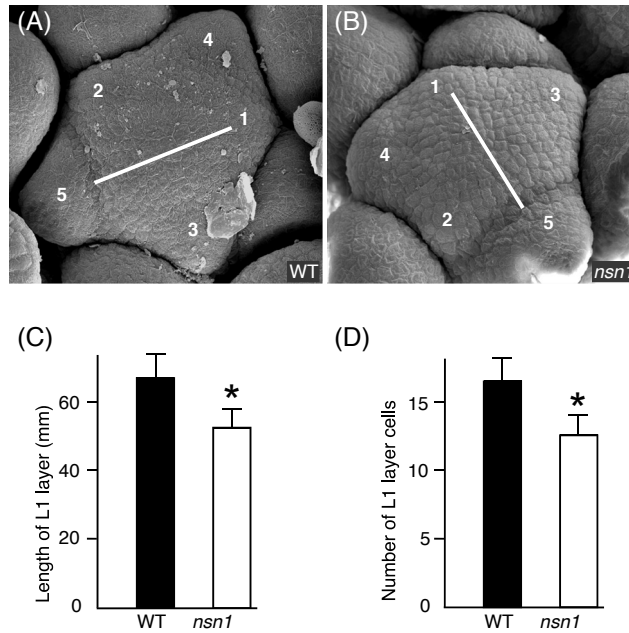

**Suppl. Figure S6.** Reduced size of spical domes in *nsn1*. A-B, Scan electron microscope (SEM) images of the wild type (A) and *nsn1-1* (B) shoot apical meristems (SAM). Floral primordia are successively numbered from 1 to 5. The lines indicate the distance along which meristem sizes and meristem cell numbers were measured. C-D, Quantification of the apical domes. The length of L1 layer epidermal cells (C) and the number of epidermal cells along the line (D) of eight plants for each genotype were analyzed. A star (\*) indicates a statistically significant difference between *nsn1* and the wide type (T-test proceeded by Origin 6.0,  $P < 0.01$ ).
